# Supplementary material
Source: PubMed Central journal article supplement (PMC6709671)

## Supplementary Appendix

This appendix has been provided by the authors to give readers additional information about their work.

Supplement to: Sparano JA, Gray RJ, Ravdin PM, et al. Clinical and genomic risk to guide the use of adjuvant therapy for breast cancer. *N Engl J Med* 2019;380:2395-405. DOI: 10.1056/NEJMoa1904819

Supplement to: Sparano JA, Gray RJ, Ravdin, PM, et al. Integrating clinical and genomic risk in breast cancer to guide adjuvant therapy.

Table of Contents

- 1. **List of contributors**..... 3-9
- 2. **Figure S1.** Nine-year DRFI rates by age and chemotherapy treatment in women with a recurrence score 16 to 25 using a natural spline model with 3 degrees of freedom. .... 10

## 1. Contributors

### Institution Name

Abbott Northwestern Hospital  
Advocate Lutheran General Hospital  
Albert Einstein College of Medicine  
Allan Blair Cancer Centre  
Allegheny General Hospital  
Augusta University Medical Center  
Australian New Zealand Breast CTG  
Baptist Health Cancer Research Network  
Baptist Health Lexington  
Bay Area Tumor Institute  
Baylor College of Medicine  
BCCA-Cancer Centre for the Southern Interior  
BCCA-Fraser Valley Cancer Centre  
BCCA-Vancouver Cancer Centre  
BCCA-Vancouver Island Cancer Centre  
Berkshire Hematology Oncology PC  
Beth Israel Deaconess Medical Center  
Brooke Army Medical Center  
Cancer Alliance of Nebraska  
Cancer Care Specialists of Central Illinois  
Cancer Center of Kansas  
Cancer Center of Santa Barbara  
Cancer Trials Ireland  
CancerCare Manitoba  
Capital Region Radiation Oncology Center  
Carle Cancer Center  
Carolinas Medical Center/Levine Cancer Institute  
Case Western Reserve University  
Case Western Reserve University  
Case Western Reserve University  
Cedar Rapids Oncology Associates  
Christiana Care Health System-Christiana Hospital  
CHUM-Hotel Dieu du Montreal  
City of Hope Comprehensive Cancer Center  
Cleveland Clinic Foundation  
Coborn Cancer Center at Saint Cloud Hospital  
Columbia Saint Mary's Water Tower Medical Commons  
Columbia University Medical Center  
Covenant Medical Center-Lakeside  
CoxHealth South Hospital  
CoxHealth South Hospital

### Principal Investigator

Patrick Flynn  
Sigrun Hallmeyer  
Joseph Sparano  
Muhammad Salim  
Thomas Julian  
Sharad Ghamande  
Janine Lombard  
Elvis Donaldson  
Lee G. Hicks  
James Feusner  
Mothaffar Rimawi  
Barbara Czerkawski  
Lee Ann Martin  
Stephen Chia  
Vanessa Bernstein  
Harvey Zimble  
Michael Atkins  
Lindsey J. Graham  
Gamini Soori  
James Wade  
Shaker Dakhil  
Frederick Kass  
Sean McDermott  
Lorne Brandes  
James L. Wade, III  
Kendrieth Rowland  
Antoinette Tan  
Bruce Averbook  
Edward Mansour  
Steven Waggoner  
Martin Wiesenfeld  
Stephen Grubbs  
Andre Robidoux  
Joanne E. Mortimer  
Robert Dreicer  
Donald Jurgens  
Craig Schulz  
Daniel Petrylak  
Ibrahim Shalaby  
J. Wendall Goodwin  
Robert L. Carolla

|                                                     |                           |
|-----------------------------------------------------|---------------------------|
| Credit Valley Hospital                              | Robert Myers              |
| Creighton University Medical Center                 | James A. Mailliard        |
| CSSS Champlain-Charles Le Moyne                     | Catherine Prady           |
| Dana-Farber / Partners CancerCare                   | Harold Burstein           |
| Dana-Farber/Harvard Cancer Center                   | Ursula Matulonis          |
| Dartmouth College - Norris Cotton Cancer Center     | Konstantin Dragnev        |
| Dartmouth Hitchcock Medical Center                  | Lesley Jarvis             |
| Dartmouth Hitchcock Medical Center                  | Mary Chamberlin           |
| Dayton Physicians LLC-Samaritan North               | Howard Gross              |
| Desert Regional Medical Center                      | Elber Camacho             |
| Doctor's Hospital of Laredo                         | Eduardo Miranda           |
| Duke University - Duke Cancer Institute             | Jeffrey Crawford          |
| Eastern Maine Medical Center                        | Sheila Pascual            |
| Eastern Maine Medical Center Cancer Care            | Thomas Openshaw           |
| Edward Hospital/Cancer Center                       | Alexander Hantel          |
| Edwards Comprehensive Cancer Center                 | Maria Tria Tirona         |
| Emory University/Winship Cancer Institute           | Charles Staley            |
| Emory University/Winship Cancer Institute           | William Wood              |
| Essentia Health Cancer Center                       | Daniel Nikceovich         |
| Florida Cancer Specialists - Sarasota Downtown      | Fadi Kayali               |
| Fox Chase Cancer Center                             | Lori Goldstein            |
| Froedtert and the Medical College of Wisconsin      | Tina Yen                  |
| Froedtert and the Medical College of Wisconsin      | Elizabeth Gore            |
| Froedtert and the Medical College of Wisconsin      | Paul S. Ritch             |
| Geisinger Wyoming Valley/Henry Cancer Center        | Srilatha Hosur            |
| Georgia Regents University                          | Anand Jillella            |
| Glens Falls Hospital                                | Robert Sponzo             |
| Good Samaritan Hospital - Cincinnati                | Kevin Grannan             |
| Greenville Health System Cancer Institute-Eastside  | Jeffrey K.Giguere         |
| Grupo de Estudios Clinicos Oncologicos del Peru     | Carlos Vallejos Sologuren |
| Halifax Health Medical Center-Cente                 | Herbert Keman             |
| Hartford Hospital                                   | Patricia DeFusco          |
| Health Sciences North                               | Pedro Lopez               |
| Hematology Oncology Associates of Central New York  | Jeffrey Kirshner          |
| Henry Ford Hospital                                 | Robert A. Chapman         |
| Hopital Maisonneuve-Rosemont                        | Pierre Dube               |
| Horizon Health Network-Saint John Regional Hospital | Margot Burnell            |
| Huntsman Cancer Institute/University of Utah        | John H. Ward              |
| Illinois Oncology Research Associates               | John Kugler               |
| Indiana Univ/Melvin and Bren Simon Cancer Center    | Patrick Loehrer           |
| Intermountain Medical Center                        | Craig Nichols             |
| Iowa Oncology Research Associates                   | Robert Behrens            |
| Iowa Oncology Research Associates                   | Roscoe Morton             |
| JHU Sidney Kimmel Comprehensive Cancer Center       | Lisa Jacobs               |

|                                                         |                            |
|---------------------------------------------------------|----------------------------|
| John H Stroger Hospital of Cook County                  | Howard Zaren               |
| John H Stroger Hospital of Cook County                  | Thomas Lad                 |
| John Muir Medical Center-Concord Campus                 | Robert L. Robles           |
| Johns Hopkins University/Sidney Kimmel Cancer Center    | Arlene Forastiere          |
| Johns Hopkins University/Sidney Kimmel Cancer Center    | Deborah Armstrong          |
| Kaiser Permanente                                       | Louis Fehrenbacher         |
| Kansas Institute of Medicine Cancer and Blood Center    | Rakesh Gaur                |
| Lankenau Hospital                                       | Paul Gilman                |
| Laura and Issac Perlmutter Cancer Center at NYU Langone | Deirdre Cohen              |
| Laura and Issac Perlmutter Cancer Center at NYU Langone | Howard Hochster            |
| Le centre hosp affilie univ de Quebec-St Sacrement      | Christine Desbiens         |
| Louisiana State University Health Sciences Center       | Glen M. Mills              |
| Louisiana State University Medical Center               | Jill Gilbert               |
| Louisiana State University Medical Center               | Rajasekharan (Raj) Warriar |
| Louisiana State University Medical Center               | Robert Veith               |
| Loyola University Medical Center                        | Patrick J. Stiff           |
| Lynn Regional Cancer Center                             | Charles Vogel              |
| M D Anderson Cancer Center                              | Scott M. Lippman           |
| M D Anderson Cancer Center                              | Jack Phan                  |
| M D Anderson Cancer Center                              | Roy S. Herbst              |
| Marin General Hospital                                  | Peter D. Eisenberg         |
| Marshfield Clinic                                       | Matthias Weiss             |
| Marshfield Clinic                                       | Tarit Kumar Banerjee       |
| Massachusetts General Hospital                          | Donald Lawrence            |
| Mayo Clinic                                             | Kurt Jaeckle               |
| Mayo Clinic                                             | Gretchen Glaser            |
| Mayo Clinic                                             | Thomas Habermann           |
| McGill University Department of Oncology                | Wilson Miller              |
| Medical University of South Carolina                    | Robert K. Stuart           |
| MedStar Franklin Square Medical Center                  | Edward McCarron            |
| MedStar Georgetown University Hospital                  | Sonia Reichert             |
| Meharry Medical College                                 | Steven Wolff               |
| Memorial Hospital of South Bend                         | Bilal Ansari               |
| Memorial Hospital of South Bend                         | Jose Bufill                |
| Memorial Hospital of South Bend                         | Rafat Ansari               |
| Memorial Sloan-Kettering Cancer Center                  | Michael Morris             |
| Mercy Cancer Center                                     | Sonia Reichert             |
| Mercy Clinic Cancer and Hematology                      | Jay Carlson                |
| Metairie Oncologists LLC                                | Jayne Gurtler              |
| Michigan State University Clinical Center               | Deimante Tamkus            |
| Missouri Baptist Medical Center                         | Bryan A. Faller            |
| Moffitt Cancer Center                                   | Hugo Fernandez             |
| Montefiore Medical Center                               | Peter Wiernik              |
| Mount Sinai Hospital                                    | Lewis Silverman            |

|                                                          |                          |
|----------------------------------------------------------|--------------------------|
| Mount Sinai Medical Center                               | Michael Schwartz         |
| MultiCare Gig Harbor Medical Park                        | John Keech               |
| Natalie Warren Bryant Cancer Center at Saint Francis     | James Lockhart           |
| Nevada Cancer Research Foundation                        | John Ellerton            |
| New Hampshire Oncology Hematology PA-Hooksett            | Douglas Weckstein        |
| Newark Beth Israel Medical Center                        | Lori Schleicher          |
| Northeast Georgia Medical Center-Gainesville             | Kendal Dixon             |
| Northeast Radiation Oncology Center                      | Christopher Peters       |
| NorthShore University HealthSystem-Evanston Hospital     | David Grinblatt          |
| NorthShore University HealthSystem-Evanston Hospital     | Gershon Locker           |
| Northside Hospital                                       | Guilherme H.C. Cantuaria |
| Northwell Health/Center for Advanced Medicine            | Daniel Budman            |
| Northwell Health/Center for Advanced Medicine            | Lora Weiselberg          |
| Northwestern University                                  | Al Benson                |
| Northwestern University                                  | Eric Donnelly            |
| Ochsner Clinic                                           | Carl Kardinal            |
| Ochsner Clinic                                           | Jyotsna Fuloria          |
| Odette Cancer Center - Sunnybrook Health Sciences Center | Rebecca Dent             |
| Ohio State University Comprehensive Cancer Center        | Claire Verschraegen      |
| Oncology Hematology Care Inc-Blue Ash                    | Patrick Ward             |
| Oregon Health and Science University                     | Christopher W. Ryan      |
| Palo Verde Cancer Specialists                            | Lawrence Kasper          |
| Penn State Milton S Hershey Medical Center               | Witold Rybka             |
| Penticton Regional Hospital                              | Deepu Mirchandani        |
| Presbyterian - Saint Lukes Medical Center - Health One   | Eduardo Pajon            |
| Princeton Community Hospital                             | Rowena Gonzales-Chambers |
| Providence Hospital                                      | Anibal Drelichman        |
| Providence Hospital                                      | Michael Meshad           |
| Providence Saint Vincent Medical Center                  | Alison Conlin            |
| Rhode Island Hospital                                    | Howard Safran            |
| Riverside Methodist Hospital                             | John Kuebler             |
| Rocky Mountain Oncology                                  | Benjamin T. Marchello    |
| Roswell Park Cancer Institute                            | Ellis Levine             |
| Rutgers Cancer Institute of New Jersey                   | Deborah Toppmeyer        |
| Rutgers Cancer Institute of New Jersey                   | Joseph Aisner            |
| Rutgers New Jersey Medical School                        | Robert Wieder            |
| Saint Joseph Hospital - Orange                           | Lawrence Wagman          |
| Saint Joseph Mercy Hospital                              | Philip Stella            |
| Saint Louis University Hospital                          | Paul J. Petruska         |
| Saint Michael's Hospital                                 | Rashida Haq              |
| Saint Vincent Hospital Cancer Center                     | Anthony Jaslowski        |
| Saint Vincent Hospital Cancer Center Green Bay           | Gerald Kurt Bayer        |
| San Juan City Hospital                                   | Luis Baez-Diaz           |
| Sanford Cancer Center Oncology Clinic                    | Loren Tschetter          |

|                                                          |                       |
|----------------------------------------------------------|-----------------------|
| Sanford Cancer Center Oncology Clinic                    | Maria Bell            |
| Sanford Cancer Center Oncology Clinic                    | Miroslaw Mazurczak    |
| Sanford Medical Center-Fargo                             | Preston Steen         |
| Saskatoon Cancer Centre                                  | Shahid Ahmed          |
| Scott & White Memorial Hospital                          | Lucas Wong            |
| Sharp Memorial Hospital                                  | Robert Barone         |
| Sky Ridge Medical Center                                 | Keren Sturtz          |
| Southeastern Medical Oncology Center                     | James Atkins          |
| Southwestern Vermont Medical Center                      | Matthew Vernon        |
| Spectrum Health at Butterworth Campus                    | Kathleen Yost         |
| Spectrum Health at Butterworth Campus                    | Marianne K. Melnik    |
| Stanford Cancer Institute Palo Alto                      | Harlan Pinto          |
| Stanford Cancer Institute Palo Alto                      | Sandra Horning        |
| Stanford University                                      | Beth Beadle           |
| State University of New York Upstate Medical University  | Stephen Graziano      |
| Staten Island University Hospital                        | Terenig Terjanian     |
| Stony Brook University Medical Center                    | Michael Pearl         |
| Sutter Cancer Research Consortium                        | Christopher Jones     |
| Swedish Medical Center-First Hill                        | Saul E. Rivkin        |
| The Community Hospital                                   | Mohamad Kassar        |
| The Moncton Hospital                                     | Hazem Assi            |
| Thomas Jefferson University Hospital                     | Maria Werner-Wasik    |
| Thompson Cancer Survival Center                          | S. Spence McCachren   |
| Thompson Cancer Survival Center                          | Zhang Wenqing         |
| Thunder Bay Regional Health Science Centre               | Adrien Chan           |
| Toledo Clinic Cancer Centers-Toledo                      | Rex Mowat             |
| Toledo Clinic Cancer Centers-Toledo                      | Paul L. Schaefer      |
| Tom Baker Cancer Centre                                  | Marc Webster          |
| Toronto East General Hospital                            | Yasmin Rahim          |
| Trillium Health Centre-West Toronto                      | John Gapski           |
| Trinity Cancer Care Center                               | Stephen Makoni        |
| Tufts Medical Center                                     | Frank Haluska         |
| Tufts Medical Center                                     | John Erban            |
| Tufts Medical Center                                     | Richard Van Etten     |
| Tulane University Health Sciences Center                 | Hana F. Safah         |
| Tulane University Health Sciences Center                 | William Robinson      |
| UC Irvine Health/Chao Family Comprehensive Cancer Center | Krishnansu Tewari     |
| UC Irvine Health/Chao Family Comprehensive Cancer Center | Sai-Hong Ignatius Ou  |
| UC San Diego Moores Cancer Center                        | Barbara Parker        |
| UC San Diego Moores Cancer Center                        | Loren Mell            |
| UCLA / Jonsson Comprehensive Cancer Center               | John A. Glaspy        |
| UCLA / Jonsson Comprehensive Cancer Center               | Robin Farias-Eisner   |
| UCSF Medical Center-Mount Zion                           | Charalambos Andreadis |
| UCSF Medical Center-Mount Zion                           | Mack Roach            |

|                                                        |                              |
|--------------------------------------------------------|------------------------------|
| UF Cancer Center at Orlando Health                     | Eleftherios (Terry) Mamounas |
| UNC Lineberger Comprehensive Cancer Center             | Thomas E. Seay               |
| UNC Lineberger Comprehensive Cancer Center             | Thomas Shea                  |
| University of Alabama at Birmingham Cancer Center      | Carla Falkson                |
| University of Arizona Medical Center-University Campus | Thomas P. Miller             |
| University of Arkansas for Medical Sciences            | Laura Hutchins               |
| University of California Davis Comp Cancer Center      | David R. Gandara             |
| University of Chicago Comprehensive Cancer Center      | Mitchell Posner              |
| University of Cincinnati                               | Eric Eisenhauer              |
| University of Cincinnati                               | Leslie Oleksowicz            |
| University of Cincinnati                               | Rami S. Komrokji             |
| University of Cincinnati                               | Zeina A. Nahleh              |
| University of Colorado Cancer Center                   | Rachel Rabinovitch           |
| University of Colorado Cancer Center                   | Anthony D. Elias             |
| University of Connecticut                              | Eric Eisenhauer              |
| University of Hawaii Cancer Center                     | Jeffrey Berenberg            |
| University of Illinois at Chicago                      | David Peace                  |
| University of Illinois at Chicago                      | John Quigley                 |
| University of Illinois at Chicago                      | Lawrence Feldman             |
| University of Iowa/Holden Comprehensive Cancer Center  | David Bender                 |
| University of Iowa/Holden Comprehensive Cancer Center  | Laith Abushahin              |
| University of Kansas Medical Center                    | Karen Kelly                  |
| University of Kentucky/Markey Cancer Center            | David Bender                 |
| University of Maryland/Greenebaum Cancer Center        | Heather Manuel               |
| University of Maryland/Greenebaum Cancer Center        | Mark Mishra                  |
| University of Massachusetts Medical School             | William Walsh                |
| University of Miami                                    | Caio Max Rocha Lima          |
| University of Michigan Comprehensive Cancer Center     | Laurence H. Baker,           |
| University of Minnesota/Masonic Cancer Center          | Bruce Peterson               |
| University of Mississippi Medical Center               | R. Darryl Hamilton           |
| University of Missouri - Ellis Fischel                 | Puja Nistala                 |
| University of Nebraska Medical Center                  | Julie Vose                   |
| University of New Mexico                               | Fa-Chyi Lee                  |
| University of North Carolina at Chapel Hill            | Simon Khagi                  |
| University of Oklahoma Health Sciences Center          | Adam Asch                    |
| University of Pennsylvania/Abramson Cancer Center      | Daniel Haller                |
| University of Pennsylvania/Abramson Cancer Center      | Robert Burger                |
| University of Pittsburgh Cancer Institute              | Warren Robinson              |
| University of Pittsburgh Cancer Institute              | John Kirkwood                |
| University of Rochester                                | Jonathan W. Friedberg        |
| University of Rochester                                | Yuhchyan Chen                |
| University of South Alabama                            | Thaddeus A. Beeker           |
| University of Southern California                      | Heinz-Josef Lenz             |
| University of Tennessee Health Science Center          | Ari M. VanderWalde           |



|                                                  |                     |
|--------------------------------------------------|---------------------|
| University of Texas Medical Branch               | Ian M. Thompson     |
| University of Vermont College of Medicine        | Christopher Anker   |
| University of Wisconsin Hospital and Clinics     | Brad Kahl           |
| University of Wisconsin Hospital and Clinics     | James Stewart       |
| Vanderbilt University/Ingram Cancer Center       | David Johnson       |
| Vanderbilt University/Ingram Cancer Center       | Jordan Berlin       |
| Virginia Oncology Associates-Hampton             | John Paschold       |
| Wake Forest University Health Sciences           | William Petty       |
| Walter Reed National Military Medical Center     | Michelle Ojemuyiwa  |
| Washington University - Siteman Cancer Center    | Nancy Bartlett      |
| Washington University School of Medicine         | David Mutch         |
| Wayne State University/Karmanos Cancer Institute | Lawrence Flaherty   |
| Wayne State University/Karmanos Cancer Institute | Michael Dominello   |
| Weill Medical College of Cornell University      | Manish Shah         |
| WellSpan Health-York Hospital                    | Amit Shah           |
| West Michigan Cancer Center                      | Raymond Lord        |
| West Virginia University Healthcare              | Mohamad Salkeni     |
| Wilford Hall Medical Center                      | Bradley A. McGregor |
| Wilford Hall Medical Center                      | Douglas A. Nelson   |
| Wilford Hall Medical Center                      | John S. Renshaw     |
| Wilford Hall Medical Center                      | Michell A. Garrison |
| Wilford Hall Medical Center                      | Thomas J. Richard   |
| William Beaumont Hospital                        | John M. Robertson   |
| Windsor Regional Cancer Centre                   | Caroline Hamm       |
| Yale University                                  | Roy Decker          |

**Figure S1.** Nine-year DRFI rates by age and chemotherapy treatment in women with a recurrence score 16 to 25 using a natural spline model with 3 degrees of freedom.

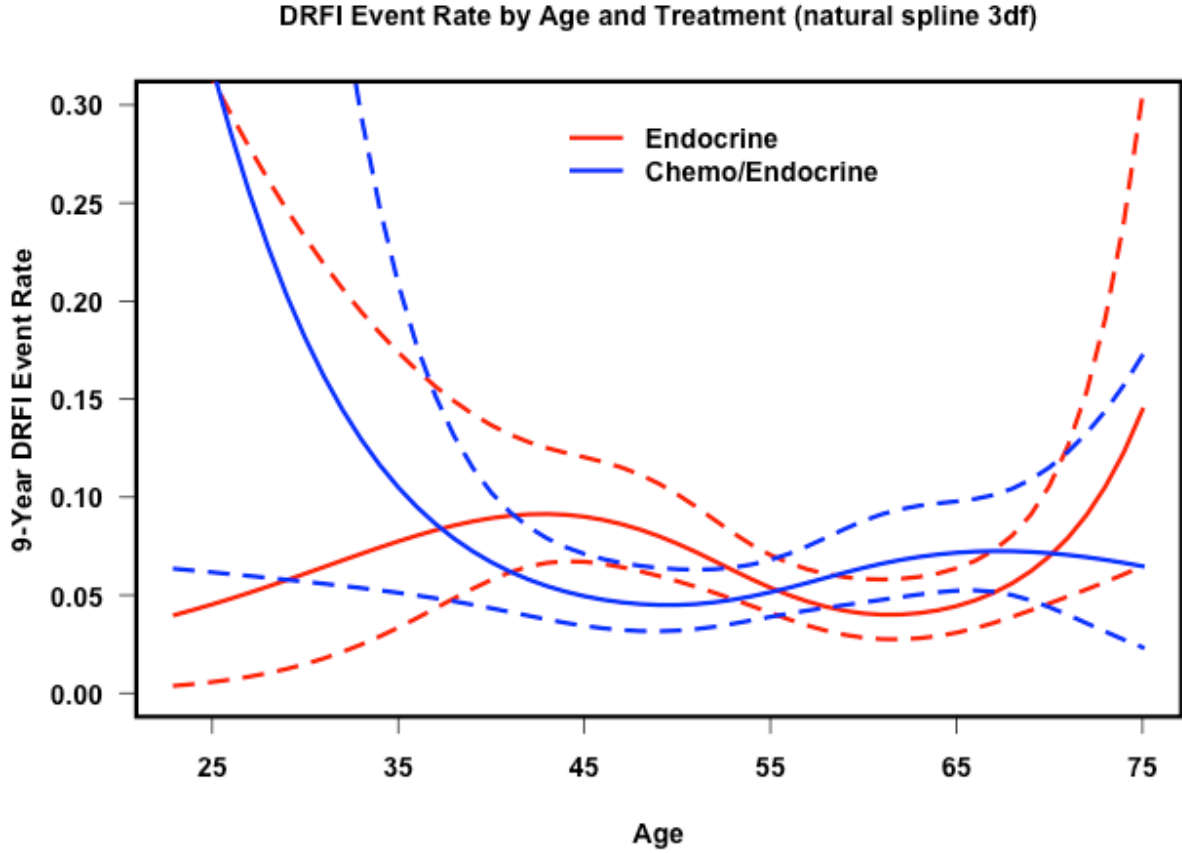

Supplement: NIHMS1536864-supplement-Supplement1.pdf [file NIHMS1536864-supplement-Supplement1.pdf]
